# Supplementary material for: Development and Evaluation of a Commercial Direct-Fed Microbial (Zymospore®) on the Fecal Microbiome and Growth Performance of Broiler Chickens under Experimental Challenge Conditions
Source: MDPI journal article supplement (doi:10.3390/ani12111436), 2022-06-02
Supplement: s1 [file s1]

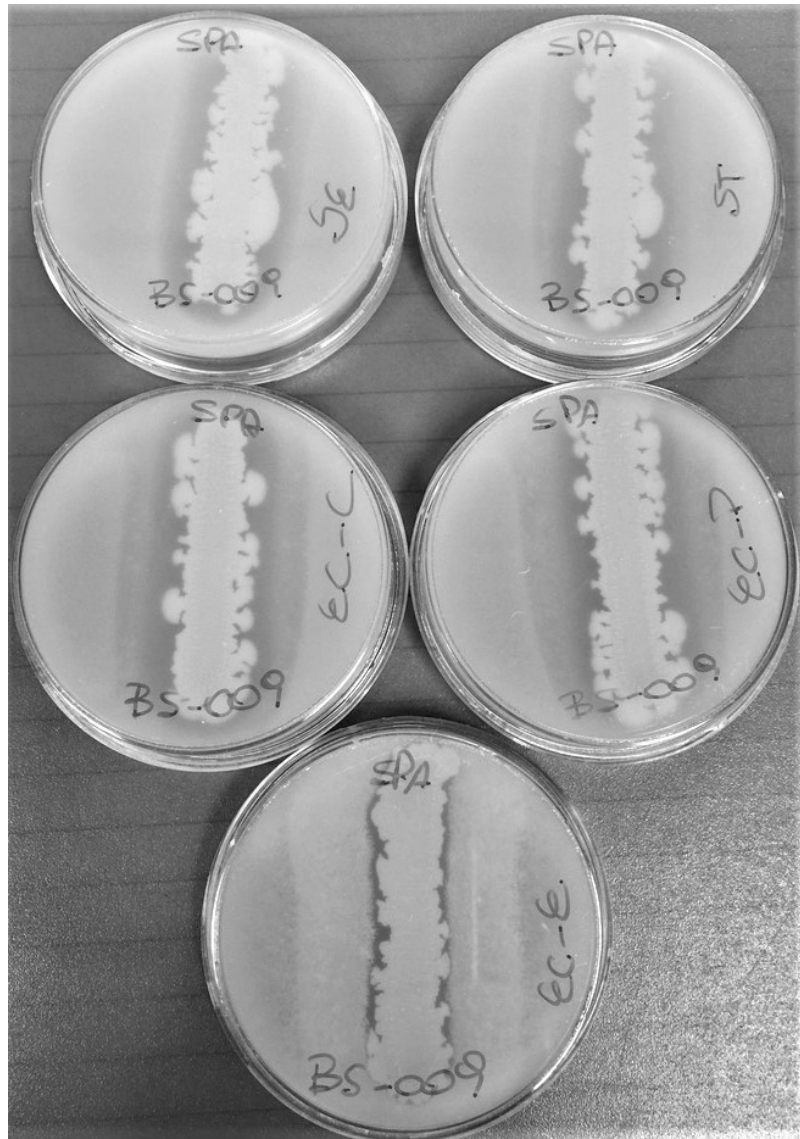

**Figure S1.** Growth inhibition of the select pathogen isolates by *Bacillus subtilis* isolate BS-009 on Spizizen potato agar (SPA) plate. SE, *Salmonella* Enteritidis; ST, *Salmonella* Typhimurium; EC-C, avian pathogenic *Escherichia coli* (APEC); EC-P, *Escherichia coli* isolated from a pig; EC-E, enteropathogenic *Escherichia coli* (EPEC).

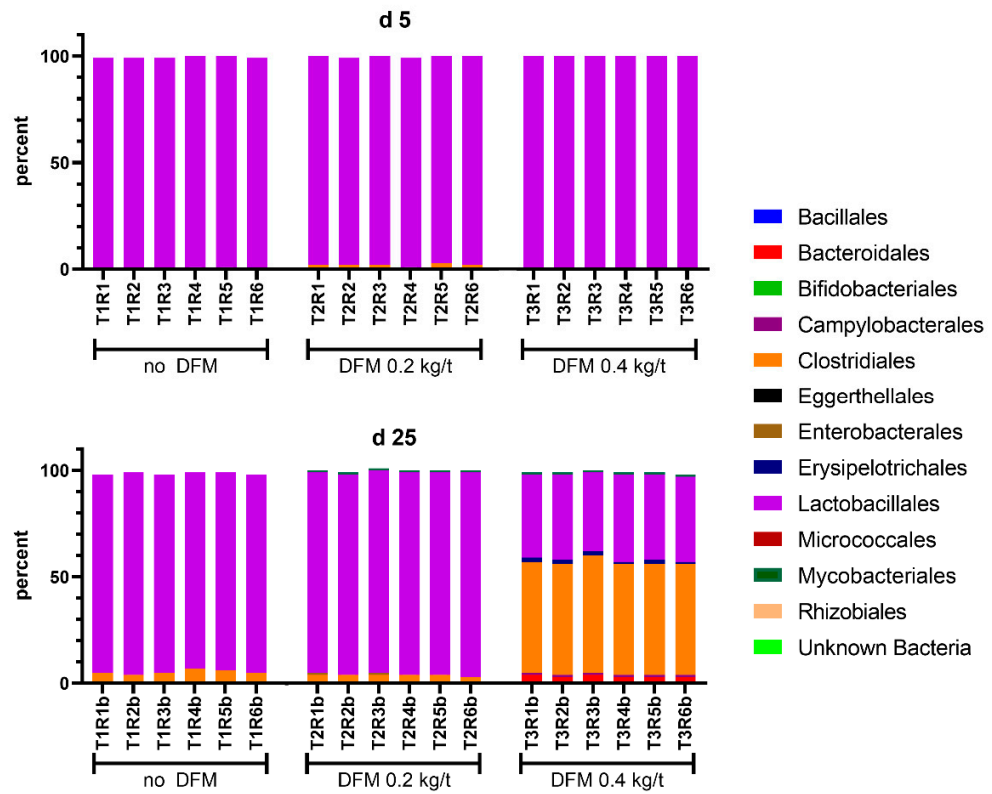

**Figure S2.** Order level proportions across individual samples for each treatment group and day of sampling. The height of each color-coded portion of the bar plot represents the percentage of that Order relative to the total number of 16S sequences classified to a taxonomic Order level identified in that sample. Individual replicates ( $R_n$ ) for each respective treatment group and sampling timepoint are shown. Only Orders with  $\geq 1\%$  proportionality are shown

**Table S1.** Growth inhibition of *Salmonella* and *Escherichia coli* isolates by *Bacillus subtilis* on SPA agar plates.

| Isolate # | SE  | ST  | EC-C | EC-P | EC-E |
|-----------|-----|-----|------|------|------|
| BS-001    | ++  | ++  | ++   | ++   | —    |
| BS-002    | ++  | ++  | ++   | ++   | —    |
| BS-003    | ++  | +   | ++   | ++   | —    |
| BS-004    | +   | ++  | +    | ++   | —    |
| BS-005    | ++  | ++  | +    | +    | +    |
| BS-007    | ++  | +   | +++  | +++  | ++   |
| BS-008    | +   | ++  | ++   | ++   | ND   |
| BS-009    | +++ | +++ | +++  | +++  | +    |
| BS-010    | +   | +   | +    | ND   | ND   |
| BS-011    | +++ | +++ | ++   | +++  | —    |
| BS-013    | ++  | ++  | ++   | +    | —    |
| BS-014    | ++  | ++  | +++  | +++  | —    |
| BS-020    | +++ | ++  | +++  | +++  | —    |
| BS-023    | ++  | ++  | +    | +    | —    |
| BS-024    | ++  | ++  | ++   | ++   | —    |

SE, *Salmonella* Enteritidis; ST, *Salmonella* Typhimurium; EC-C, avian pathogenic, *Escherichia coli* (APEC); EC-P, *Escherichia coli* isolated from a pig; EC-E, enteropathogenic *Escherichia coli* (EPEC). (—) Bacteria grew to the edge of the *B. subtilis* streak. (+) Narrow halo around *B. subtilis* streak, < 2.0 cm. (++) Halo around *B. subtilis* streak, 2.1—4.5 cm. (+++) Halo around *B. subtilis* streak, > 4.6 cm. (ND) Growth inhibition not determined.
